# Supplementary material for: Kinetic sculpting of the seven stripes of the Drosophila even-skipped gene
Source: eLife journal article supplement (doi:10.7554/elife.61635), 2020-12-10
Supplement: supp [file elife-61635-supp-v1.zip]

Archive with 3 entries (3 files):
- elife_poa_e61635_Transparent_Reporting_File.docx
- elife_poa_e61635_Supplementary_file_1.tgz
- elife_poa_e61635_Figure_7_figure_supplement_1.pdf
