# Supplementary material for: Kinetic sculpting of the seven stripes of the Drosophila even-skipped gene
Source: eLife journal article supplement (doi:10.7554/elife.61635), 2020-12-10
Supplement: supp [file elife-61635-supp-v1.zip › elife_poa_e61635_Figure_7_figure_supplement_1.pdf]

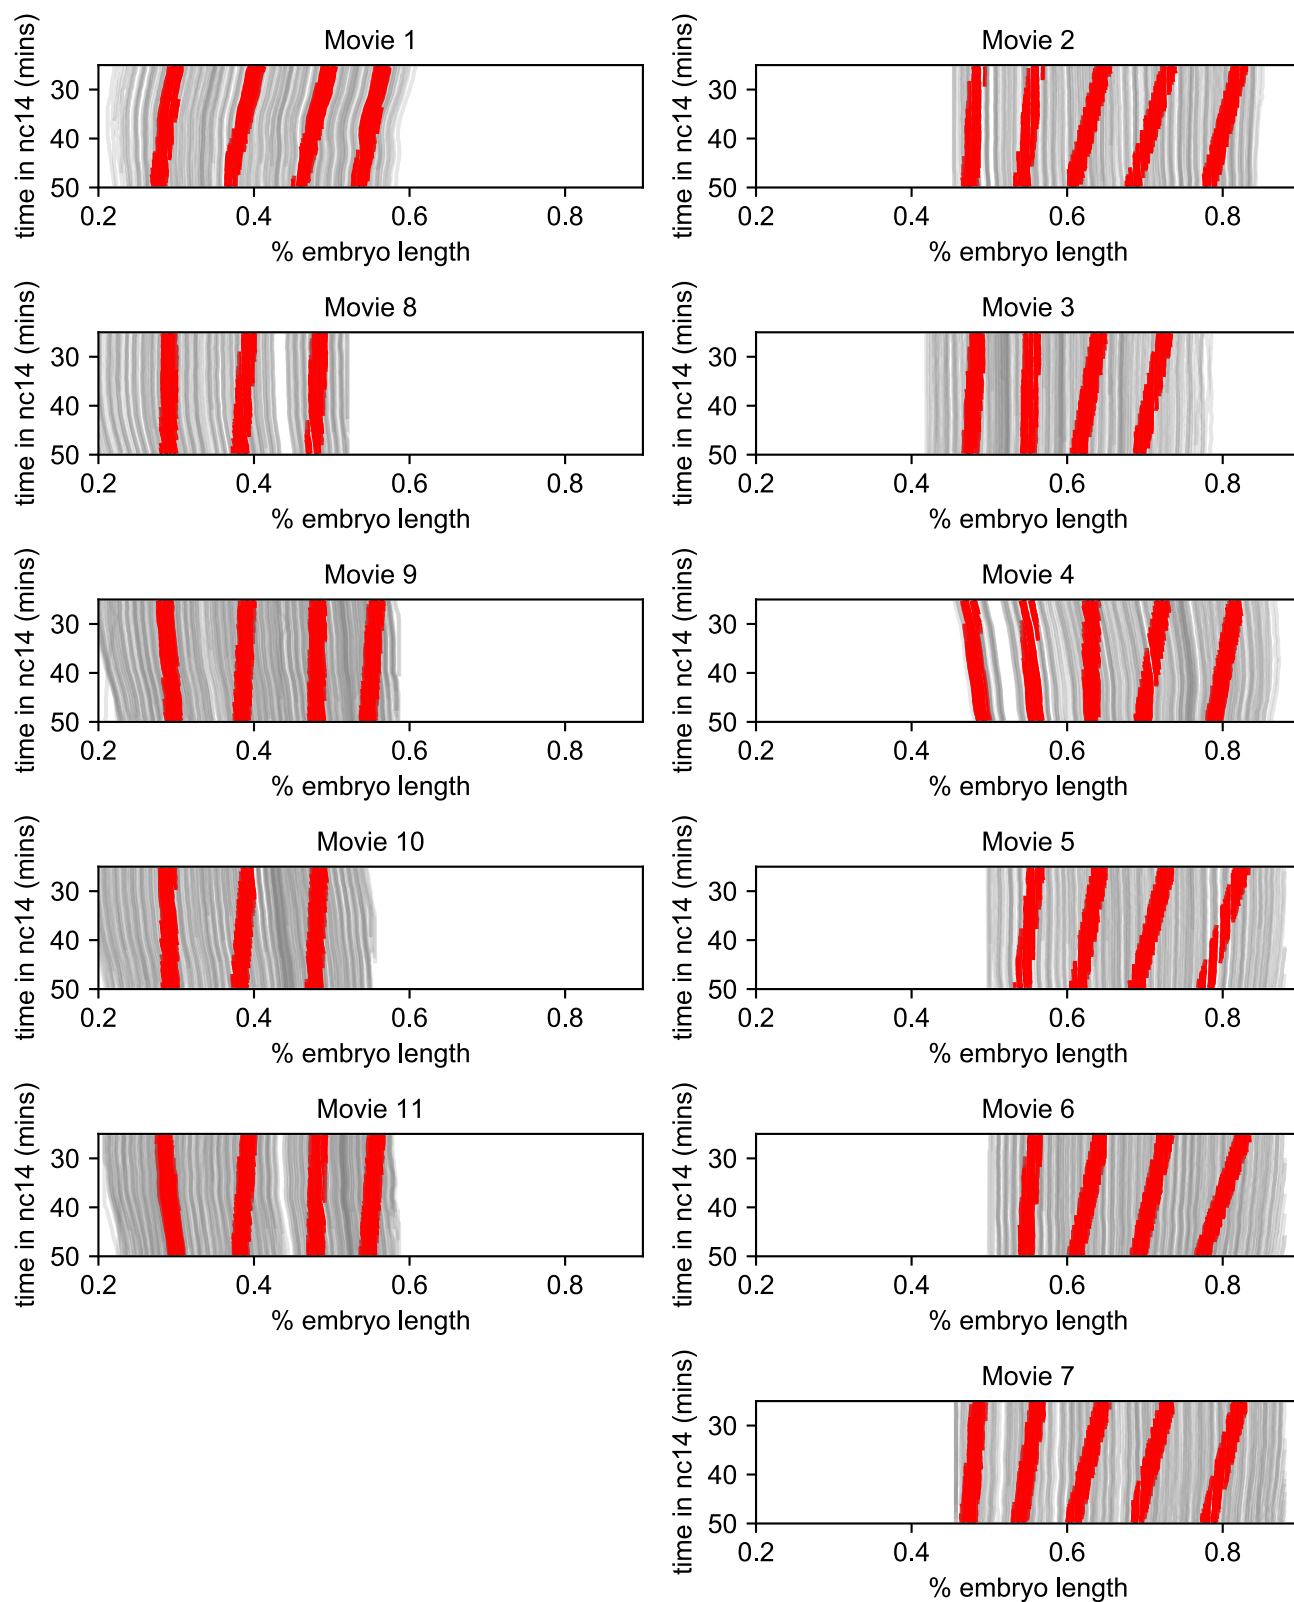

**Figure 7-S1. Stripe movement is dominated by the movement of transcriptional activity.** Traces of nuclei positions over time (gray lines) from all eleven movies with time points corresponding to transcriptional bursts annotated as in stripes colored red.
