# Supplementary material for: Kinetic sculpting of the seven stripes of the Drosophila even-skipped gene
Source: eLife journal article supplement (doi:10.7554/elife.61635), 2020-12-10
Supplement: supp1 [file elife-61635-supp1-v2.zip]

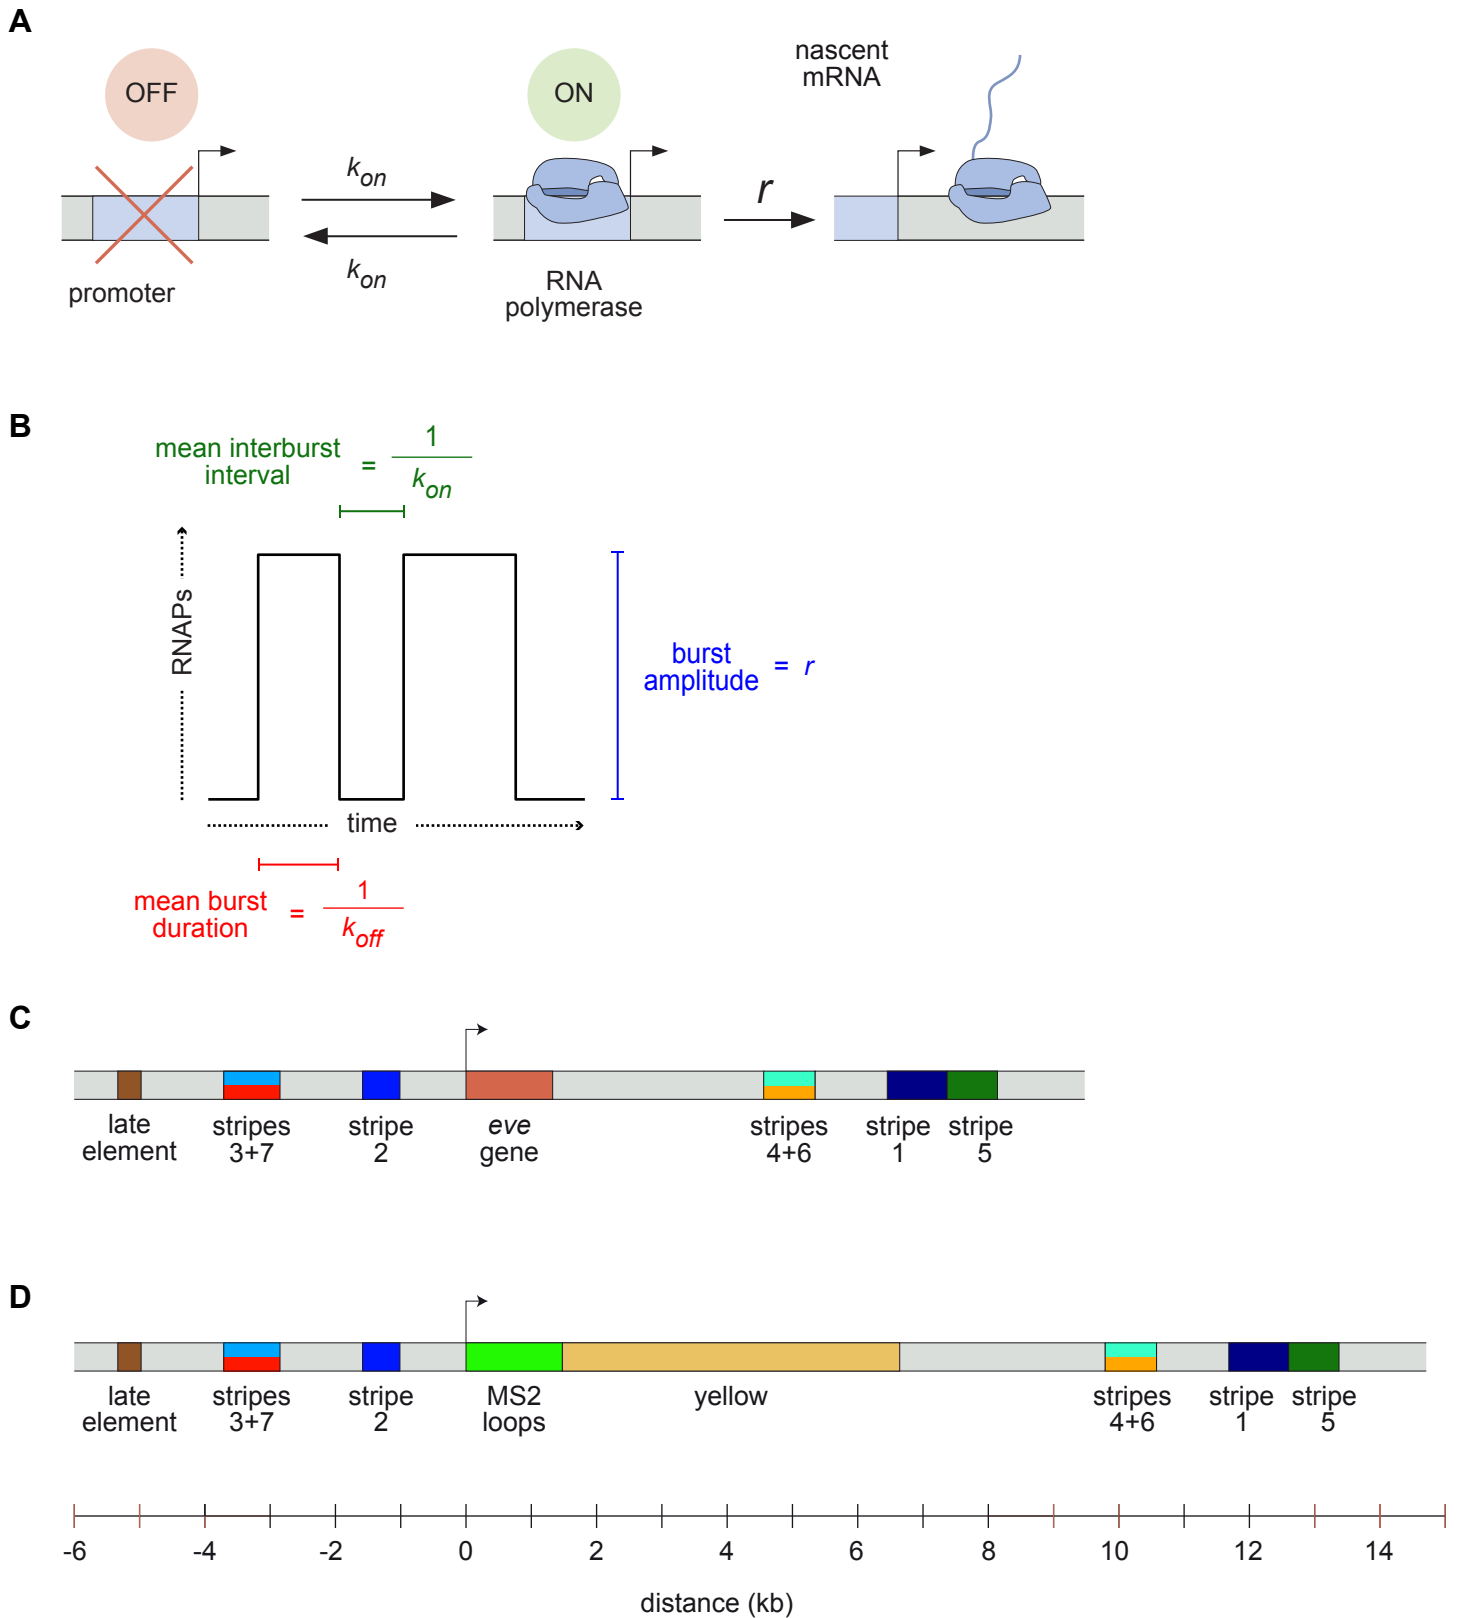

**Figure 1. Visualizing live transcription from the seven stripes of *D. melanogaster* even-skipped.** (A) Simple model of transcriptional bursting by promoter switching between ON and OFF states. (B) The promoter switching parameters define the burst duration, frequency and amplitude. (C) Wild-type *eve* locus showing the five stripe enhancers (1,2,3+7,4+6,5) and the late enhancer element. Colors for individual stripes are used throughout figures. (D) Layout of the engineered *eve* BAC showing the locations of the MS2 stem loop array and *yellow* gene.
