# Supplementary figures and images for: Kinetic sculpting of the seven stripes of the Drosophila even-skipped gene
Source: eLife journal article supplement (doi:10.7554/elife.61635), 2020-12-10

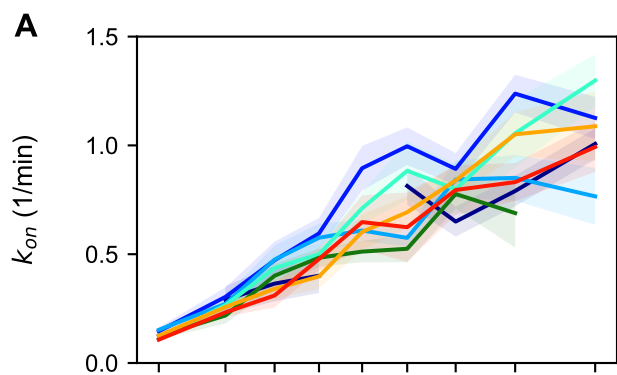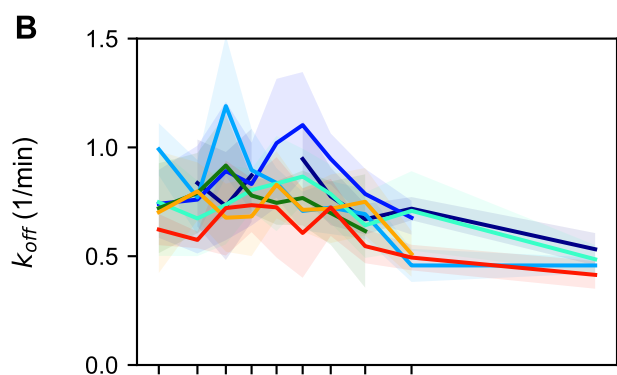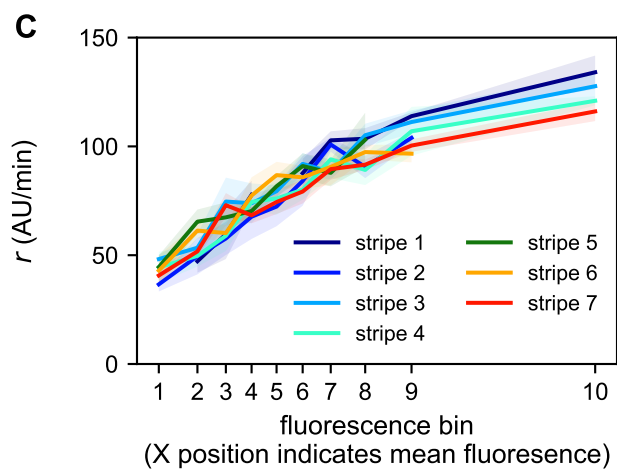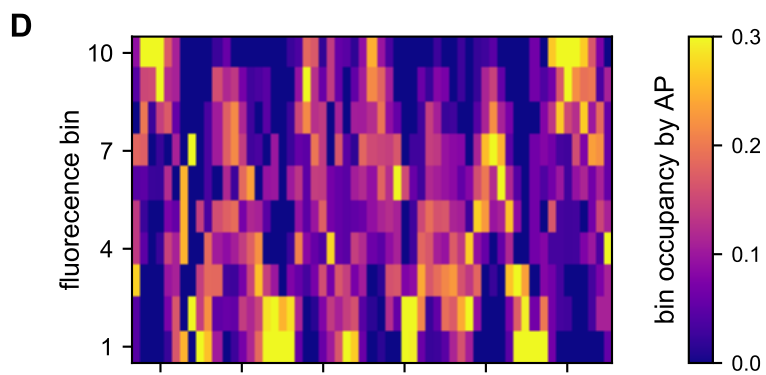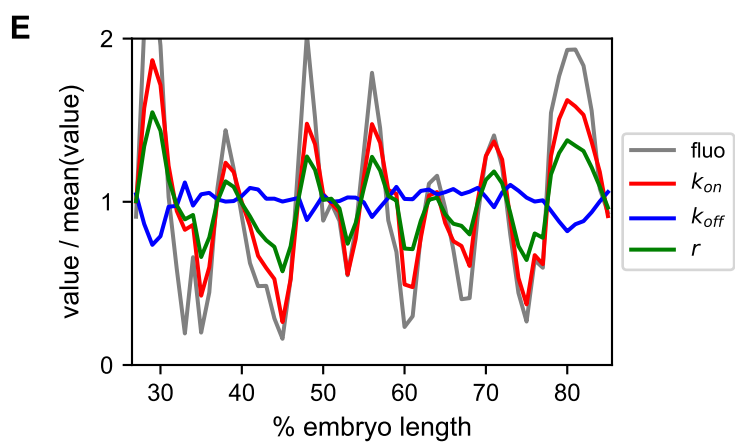

Supplement: supp1 [file elife-61635-supp1-v2.zip]

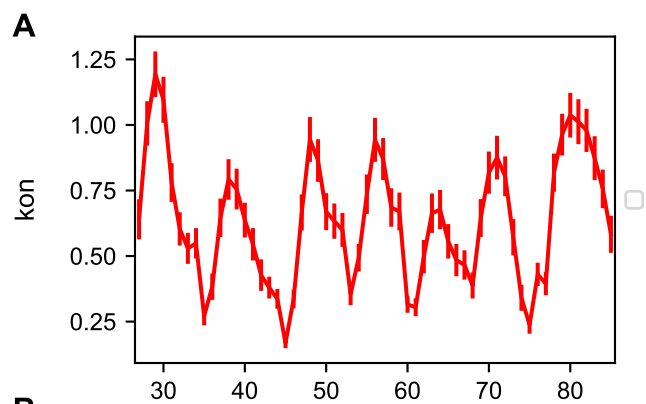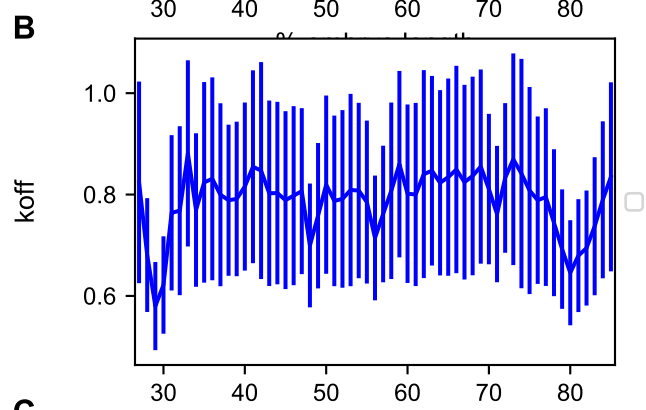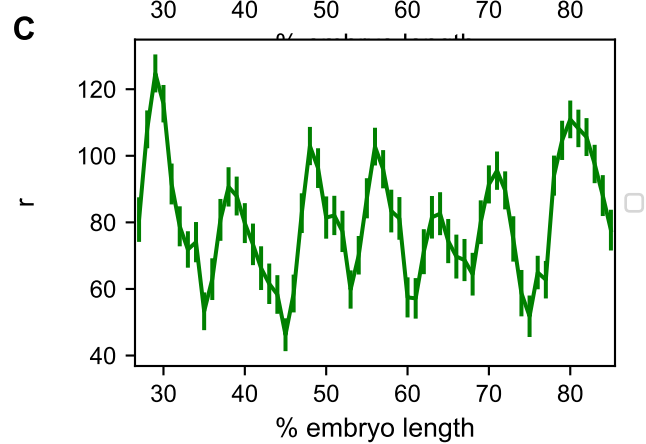

Supplement: supp1 [file elife-61635-supp1-v2.zip]

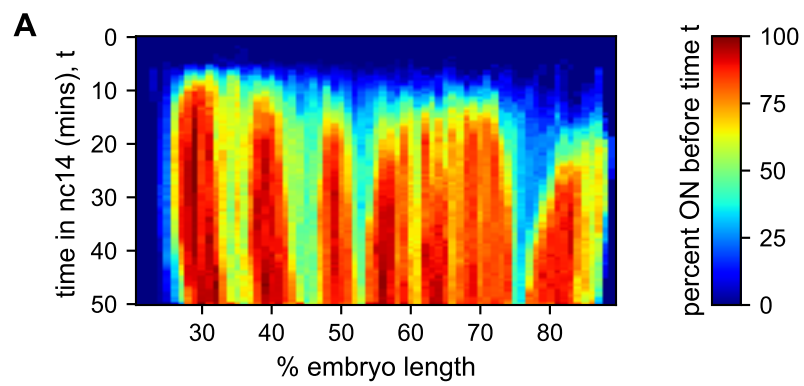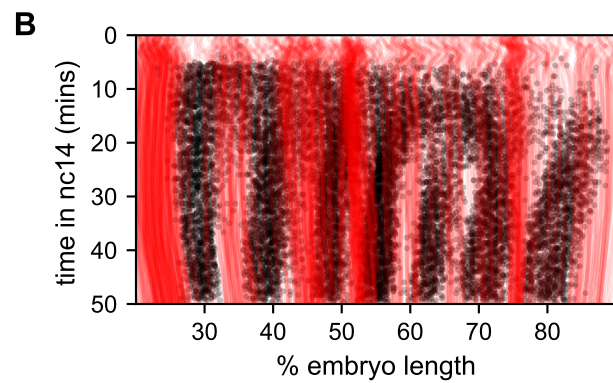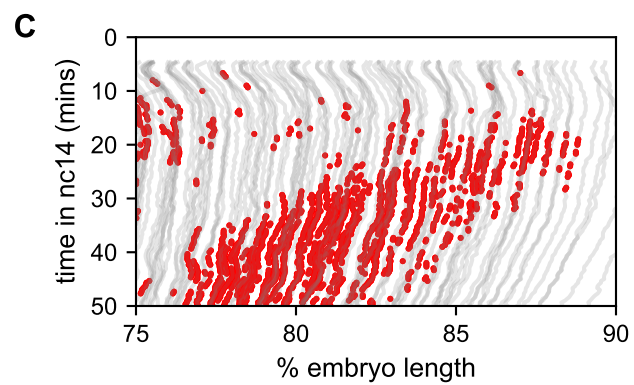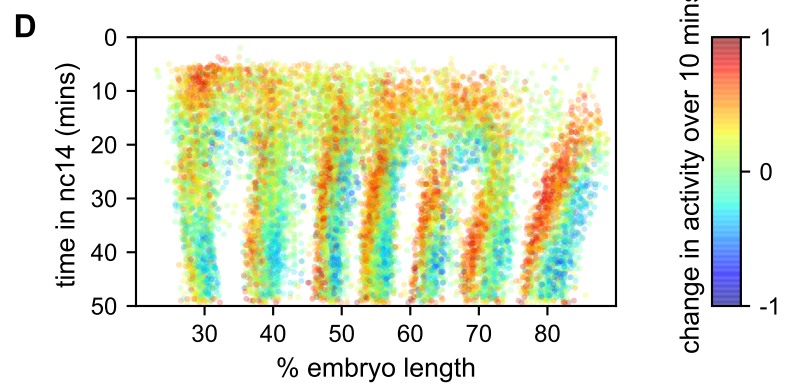

Supplement: supp1 [file elife-61635-supp1-v2.zip]

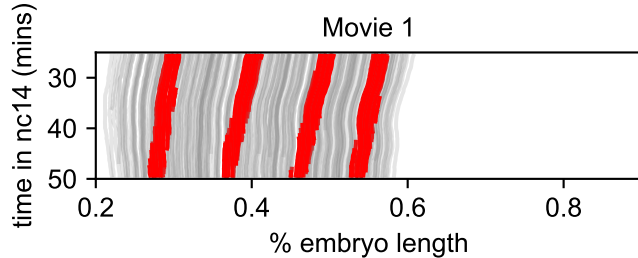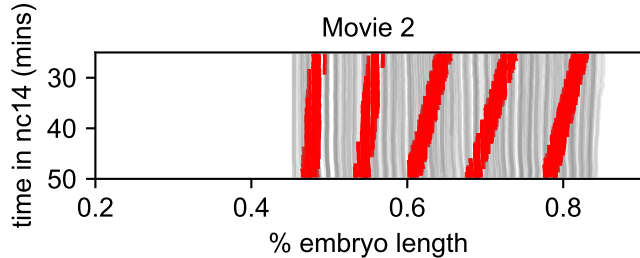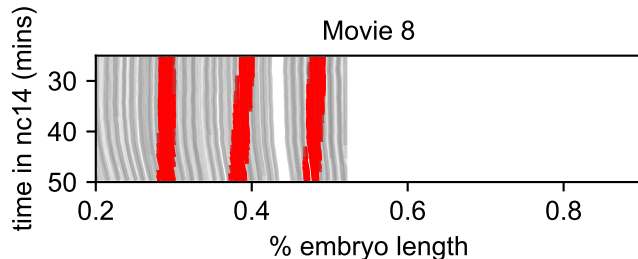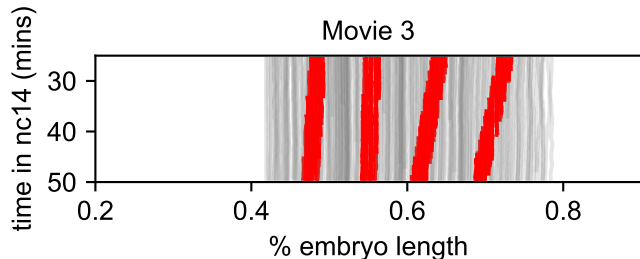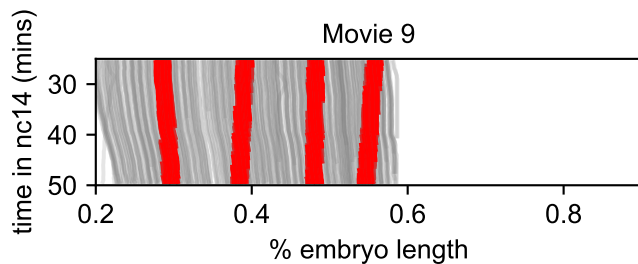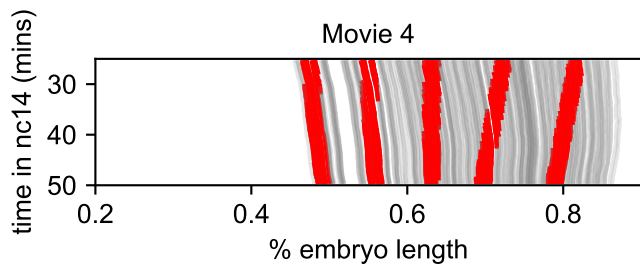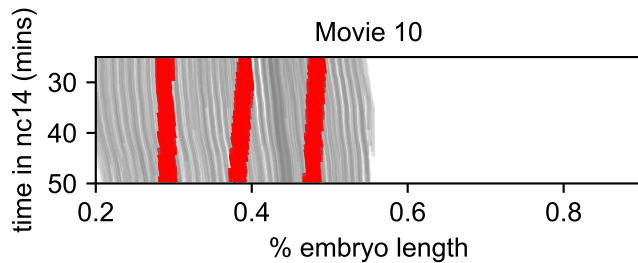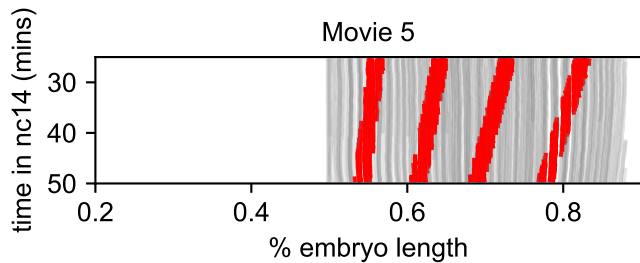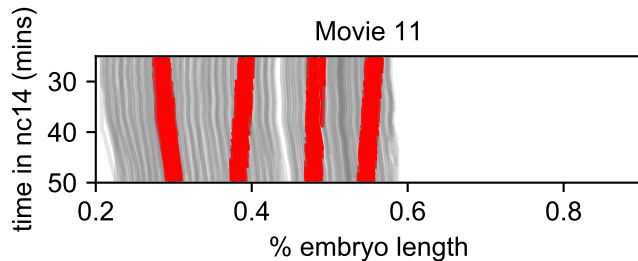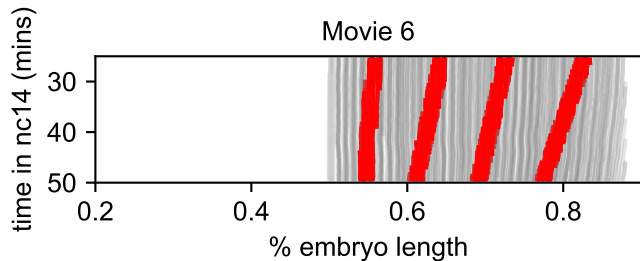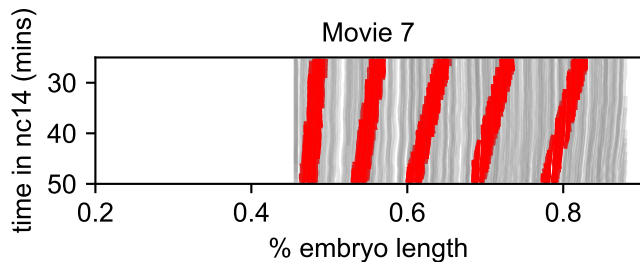

Supplement: supp1 [file elife-61635-supp1-v2.zip]

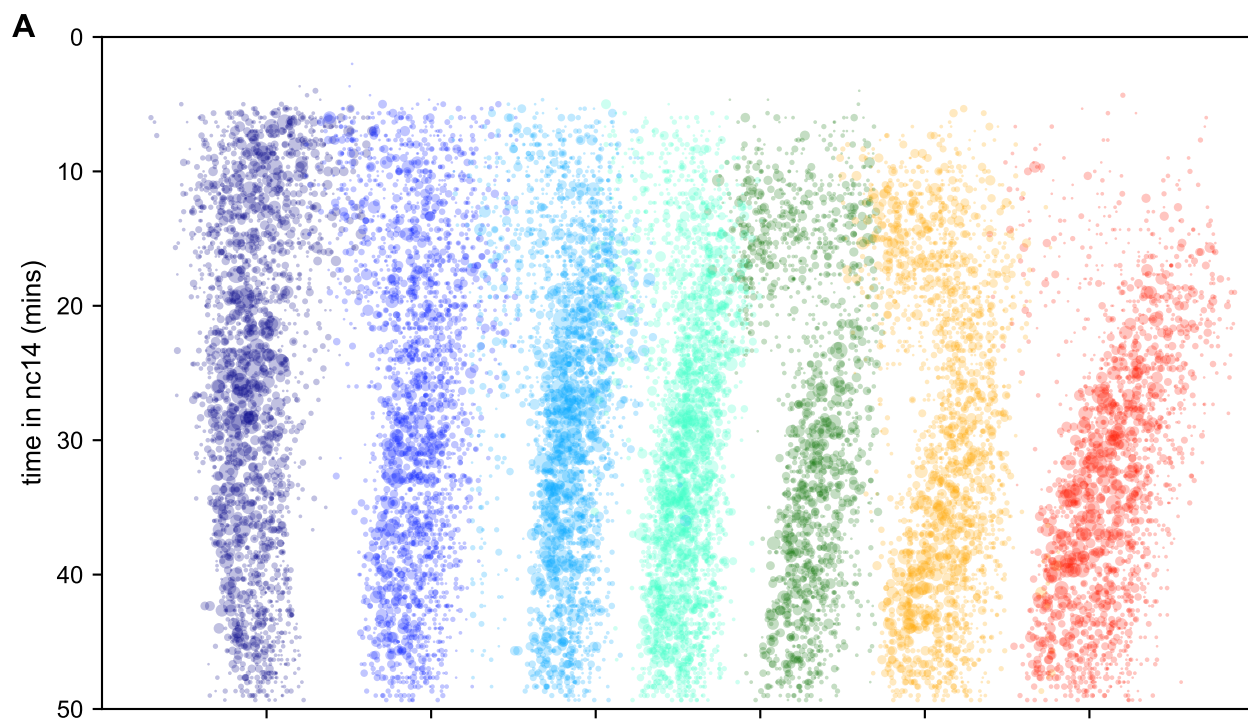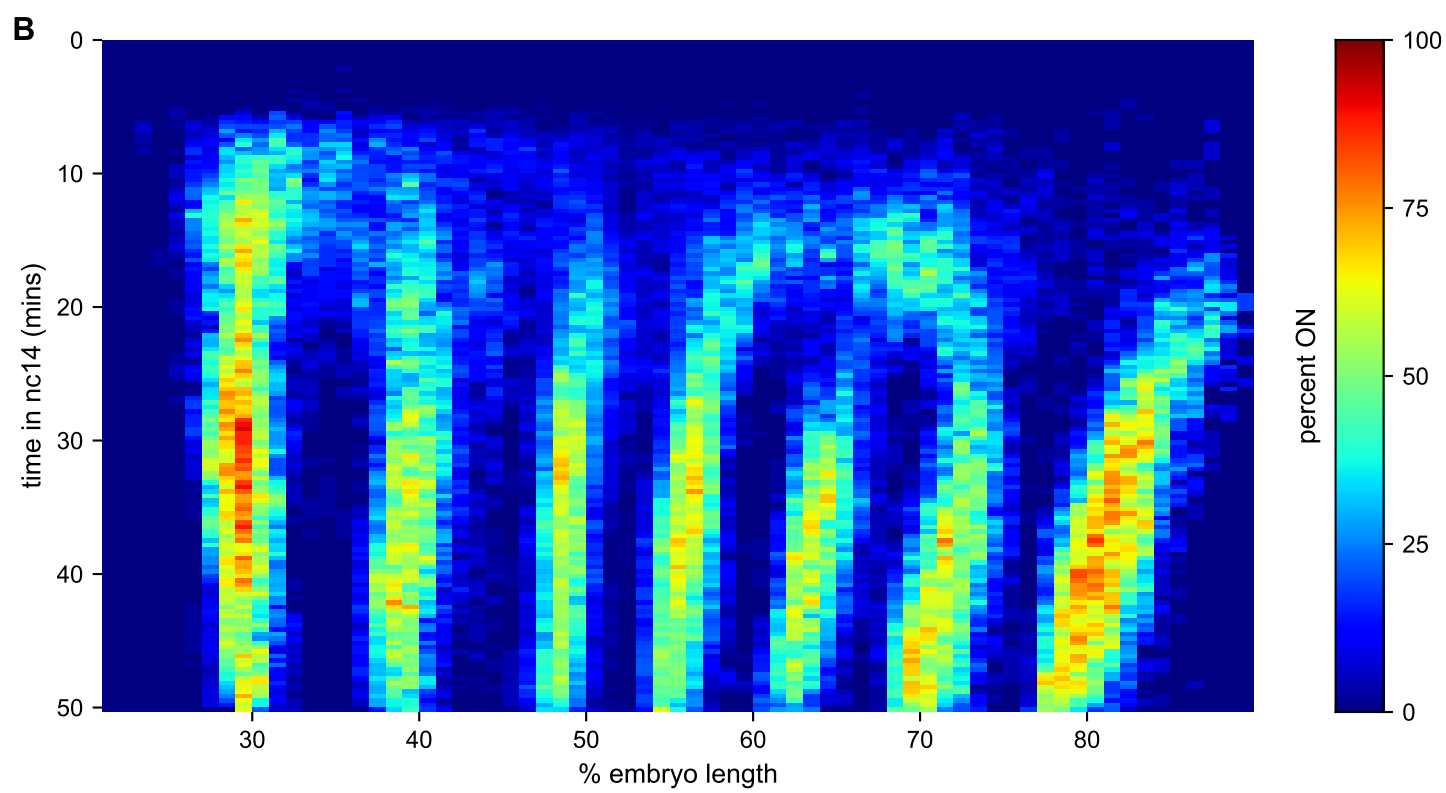

Supplement: supp1 [file elife-61635-supp1-v2.zip]

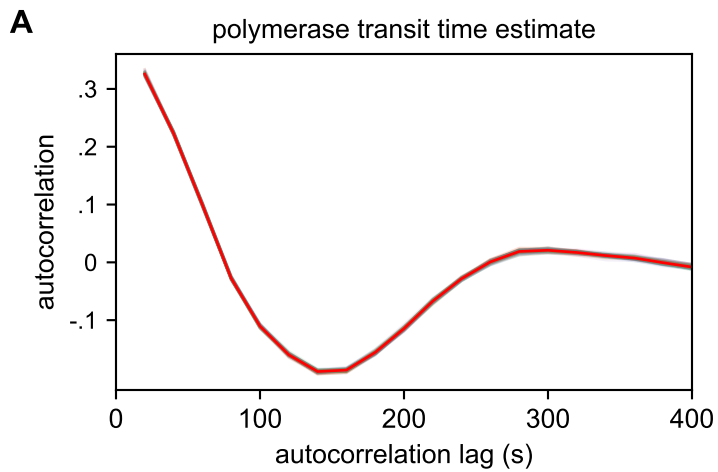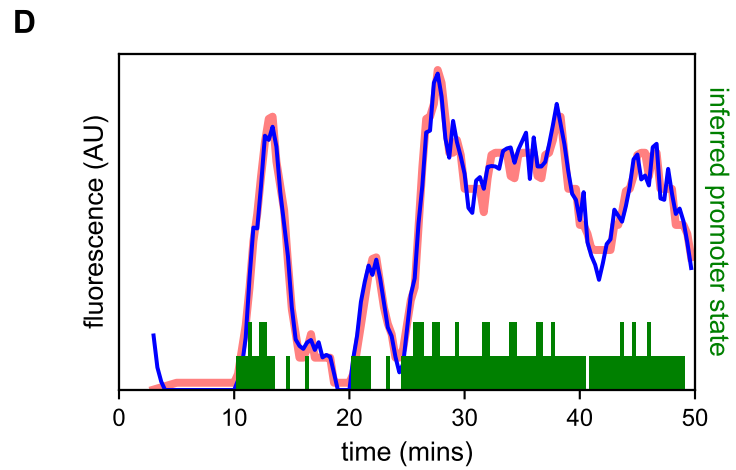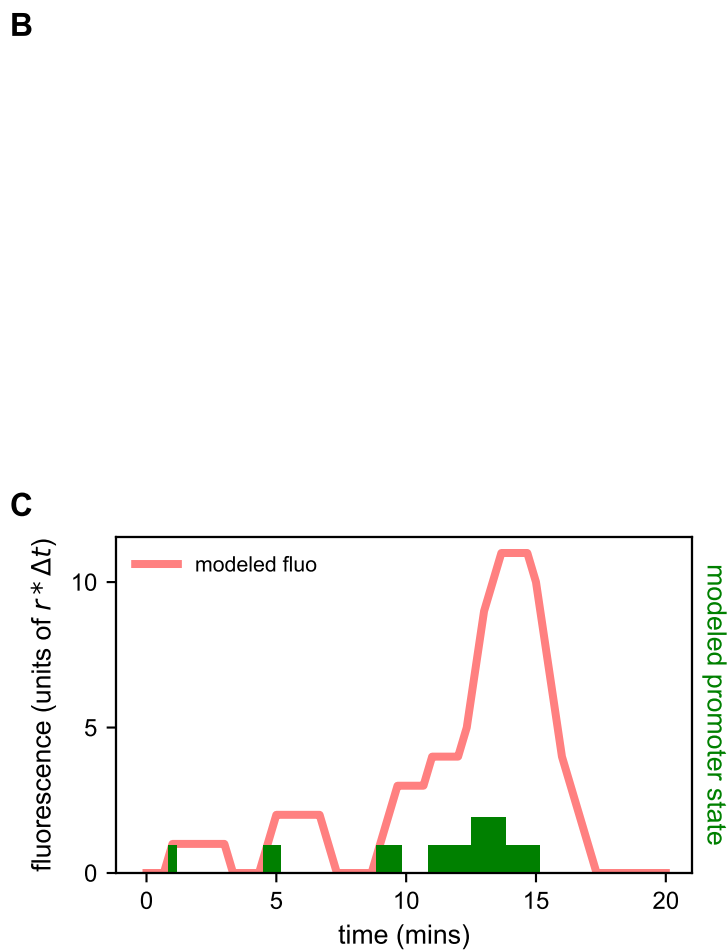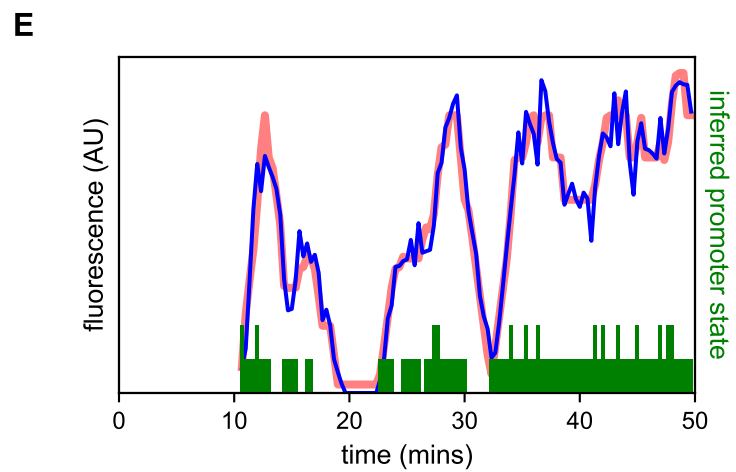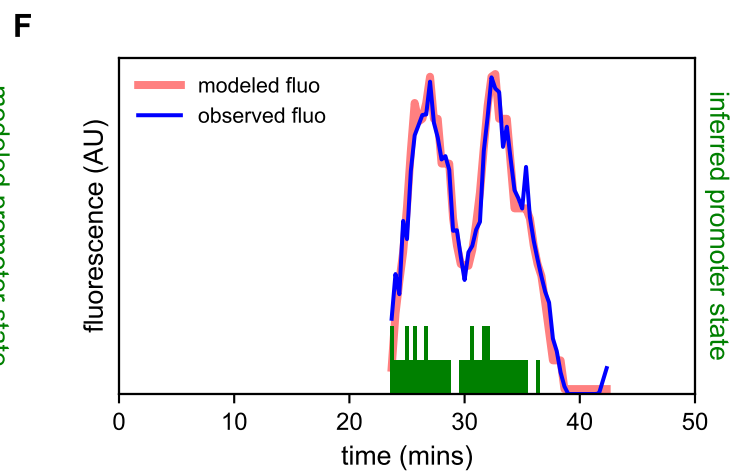

Supplement: supp1 [file elife-61635-supp1-v2.zip]

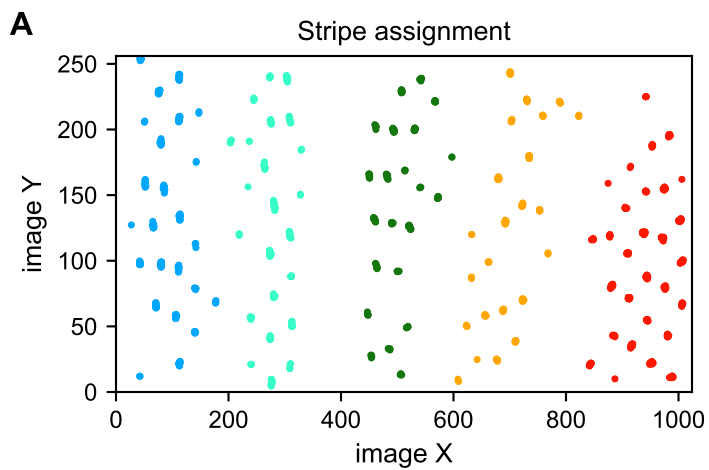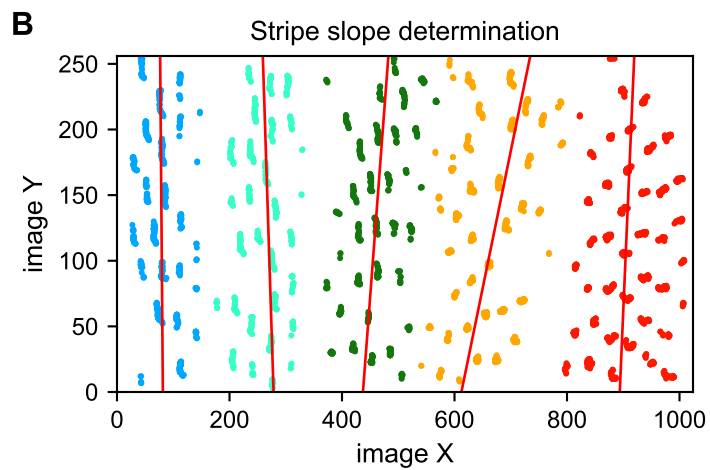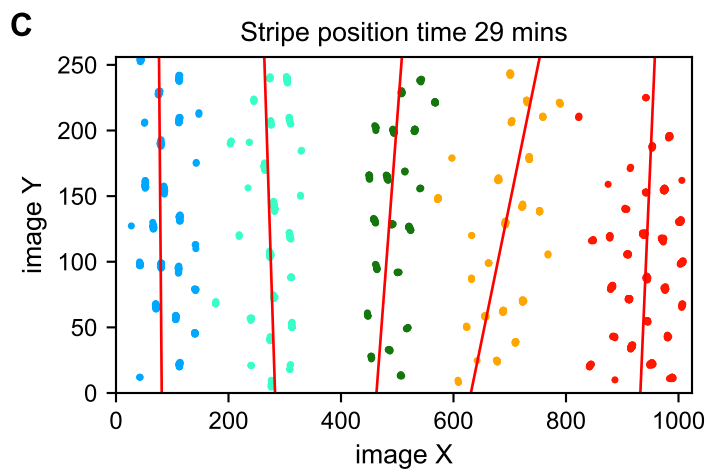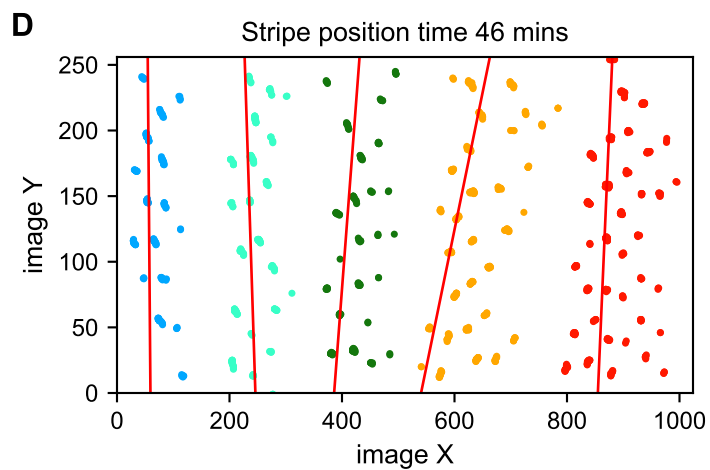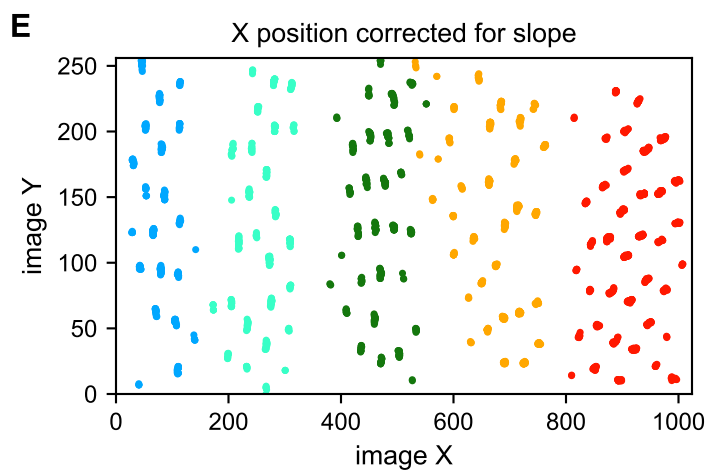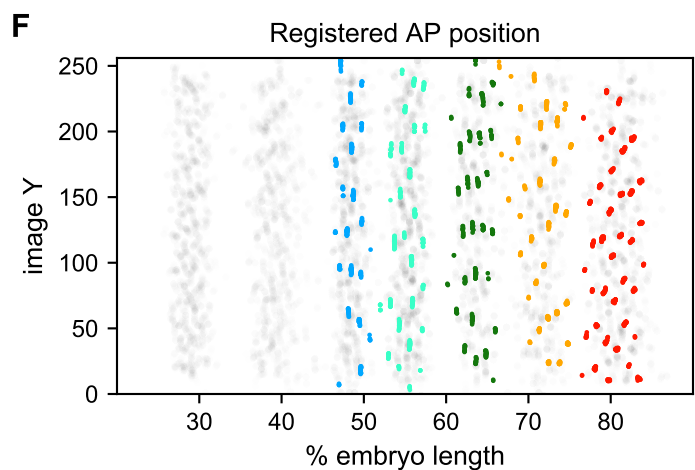

Supplement: supp1 [file elife-61635-supp1-v2.zip]

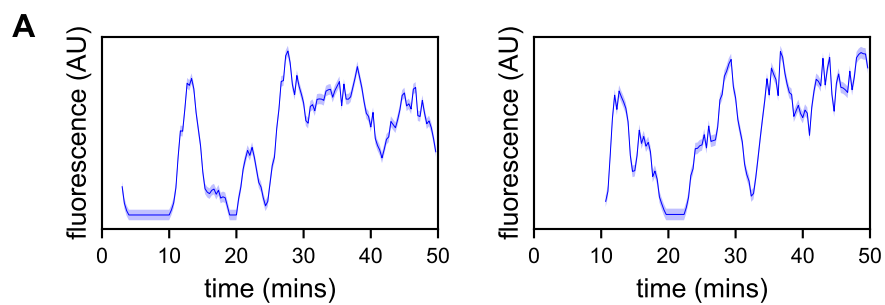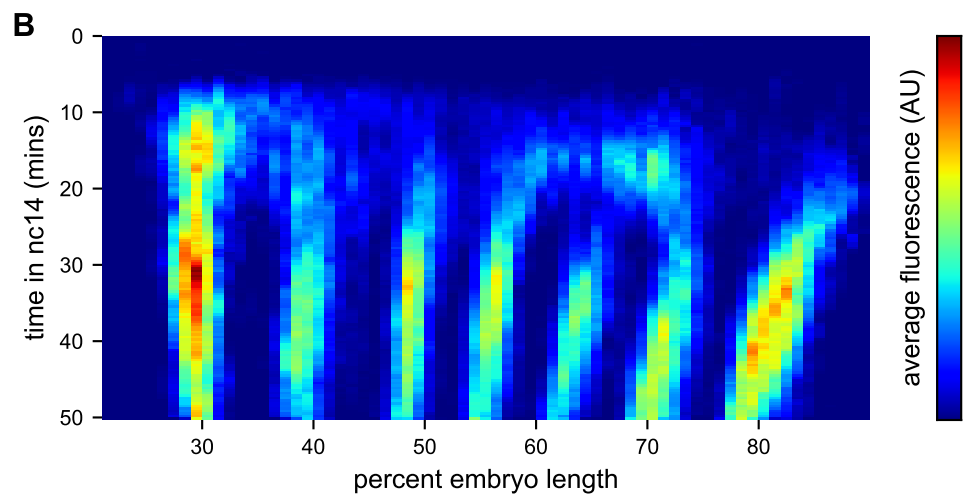

Supplement: supp1 [file elife-61635-supp1-v2.zip]
